# Supplementary material
Source: bioRxiv or medRxiv preprint supplement (https://www.biorxiv.org/highwire/filestream/26902/field_highwire_adjunct_files/1/095349-10.pdf)
Supplement: Supplementary file [file 095349-10.pdf]

| Top promoter[SNPs in top promoter]                                                                                                                                                                                    | Linkage                                                                                                                                                                                                                    | Corrected coexpression score | FDR  |
|-----------------------------------------------------------------------------------------------------------------------------------------------------------------------------------------------------------------------|----------------------------------------------------------------------------------------------------------------------------------------------------------------------------------------------------------------------------|------------------------------|------|
| p3@RPL17 [rs3814888]                                                                                                                                                                                                  |                                                                                                                                                                                                                            | 0.68                         | 0.0  |
|                                                                                                                                                                                                                       | rs3814888:rs7506517 D'=1.0; r <sup>2</sup> =0.57.<br>enhancer@chr18:46946352-46946456 [rs7506517]                                                                                                                          | 0.05                         | 0.91 |
| p1@CENPW [rs9388486]                                                                                                                                                                                                  |                                                                                                                                                                                                                            | 0.67                         | 0.0  |
| p1@TCF19 [rs720468, rs3130456]                                                                                                                                                                                        |                                                                                                                                                                                                                            | 0.65                         | 0.0  |
| p1@RPL35P2 [rs6457769]                                                                                                                                                                                                |                                                                                                                                                                                                                            | 0.62                         | 0.0  |
| p1@PSMC3 [rs7948705]                                                                                                                                                                                                  |                                                                                                                                                                                                                            | 0.6                          | 0.0  |
|                                                                                                                                                                                                                       | rs7948705:rs3740689 D'=1.0; r <sup>2</sup> =0.58.<br>p@chr11:47380465..47380487,- [rs3740689]                                                                                                                              | 0.02                         | 0.98 |
| p@chr1:184021069..184021077,+ [rs2274432]                                                                                                                                                                             |                                                                                                                                                                                                                            | 0.58                         | 0.0  |
| p2@CPNE1, p2@REB12 [rs6119636]                                                                                                                                                                                        |                                                                                                                                                                                                                            | 0.56                         | 0.0  |
| p@chr17:47039347..47039351,+ [rs2291725, rs2291726]                                                                                                                                                                   |                                                                                                                                                                                                                            | 0.54                         | 0.0  |
| p1@NCAPG [rs11941723, rs2074974]                                                                                                                                                                                      |                                                                                                                                                                                                                            | 0.54                         | 0.0  |
|                                                                                                                                                                                                                       | rs2074974:rs4698210 D'=1.0; r <sup>2</sup> =0.62.<br>enhancer@chr4:17827662-17827866 [rs4698210]                                                                                                                           | 0.31                         | 0.21 |
| p2@RQCD1 [rs500422]                                                                                                                                                                                                   |                                                                                                                                                                                                                            | 0.52                         | 0.0  |
|                                                                                                                                                                                                                       | rs500422:rs611203 D'=1.0; r <sup>2</sup> =0.98. p2@PLCD4<br>[rs611203]                                                                                                                                                     | 0.12                         | 0.76 |
| p@chr6:31595842..31595910,- [rs1046080]                                                                                                                                                                               |                                                                                                                                                                                                                            | 0.51                         | 0.0  |
|                                                                                                                                                                                                                       | rs1046080:rs3130054 D'=0.56; r <sup>2</sup> =0.19. p1@MCCD1<br>[rs3130054]                                                                                                                                                 | 0.28                         | 0.3  |
| p4@HIST1H4A, p4@HIST1H4B, p4@HIST1H4D,<br>p4@HIST1H4E, p4@HIST1H4F, p4@HIST1H4H,<br>p4@HIST1H4I, p4@HIST1H4J, p4@HIST1H4K,<br>p4@HIST1H4L, p4@HIST2H4A, p4@HIST2H4B,<br>p4@HIST4H, p5@HIST1H4C [rs2393593, rs3999544] |                                                                                                                                                                                                                            | 0.51                         | 0.0  |
| p@chr20:47679880..47679883,+ [rs6019621]                                                                                                                                                                              |                                                                                                                                                                                                                            | 0.49                         | 0.0  |
| p1@JMJ4 [rs2295994]                                                                                                                                                                                                   |                                                                                                                                                                                                                            | 0.49                         | 0.0  |
| p1@ZNF1-AS1 [rs6648]                                                                                                                                                                                                  |                                                                                                                                                                                                                            | 0.48                         | 0.0  |
| p1@EXOSC5 [rs10853751]                                                                                                                                                                                                |                                                                                                                                                                                                                            | 0.48                         | 0.0  |
|                                                                                                                                                                                                                       | same SNP, different promoter:<br>chr19:41903221..41903222,+ [rs10853751]                                                                                                                                                   | 0.07                         | 0.85 |
| p@chr2:242192880..242192896,- [rs7578199]                                                                                                                                                                             |                                                                                                                                                                                                                            | 0.47                         | 0.0  |
| p12@ZBTB38 [rs1863868]                                                                                                                                                                                                |                                                                                                                                                                                                                            | 0.47                         | 0.0  |
| p@chr7:23507613..23507647,+ [rs4496867]                                                                                                                                                                               |                                                                                                                                                                                                                            | 0.46                         | 0.0  |
| chr16:2257216..2257230,+ [rs26862]                                                                                                                                                                                    |                                                                                                                                                                                                                            | 0.45                         | 0.0  |
| p@chr9:95691523..95691530,- [rs13296126]                                                                                                                                                                              |                                                                                                                                                                                                                            | 0.43                         | 0.01 |
|                                                                                                                                                                                                                       | rs13296126:rs13293147 D'=0.97; r <sup>2</sup> =0.6.<br>enhancer@chr9:95727493-95728071 [rs13293147]                                                                                                                        | 0.04                         | 0.93 |
| chr9:86593333..86593367,- [rs167203]                                                                                                                                                                                  |                                                                                                                                                                                                                            | 0.43                         | 0.01 |
| p@chr7:92244110..92244132,- [rs42039]                                                                                                                                                                                 |                                                                                                                                                                                                                            | 0.43                         | 0.01 |
| p@chr6:28926723..28926729,+ [rs6901599]                                                                                                                                                                               |                                                                                                                                                                                                                            | 0.41                         | 0.03 |
| p@chr4:145568170..145568180,- [rs7689420]                                                                                                                                                                             |                                                                                                                                                                                                                            | 0.41                         | 0.03 |
| enhancer@chr7:46431809-46432084 [rs12534091]                                                                                                                                                                          |                                                                                                                                                                                                                            | 0.39                         | 0.04 |
|                                                                                                                                                                                                                       | rs12534091:rs13231201 D'=1.0; r <sup>2</sup> =0.85.<br>p@chr7:46385081..46385087,+ [rs13231201,<br>rs13233996]:rs12534091:rs13233996 D'=1.0; r <sup>2</sup> =0.85.<br>p@chr7:46385081..46385087,+ [rs13231201, rs13233996] | 0.24                         | 0.41 |
| p1@ENST00000408001 [rs2764205]                                                                                                                                                                                        |                                                                                                                                                                                                                            | 0.39                         | 0.04 |
|                                                                                                                                                                                                                       | rs2764205:rs3800457 D'=1.0; r <sup>2</sup> =0.96.<br>enhancer@chr6:34663389-34663600 [rs3800457]                                                                                                                           | 0.16                         | 0.62 |
| p@chr17:59485435..59485452,+ [rs2240736]                                                                                                                                                                              |                                                                                                                                                                                                                            | 0.39                         | 0.05 |
| chr11:75277935..75277984,+ [rs651581]                                                                                                                                                                                 |                                                                                                                                                                                                                            | 0.39                         | 0.05 |
| enhancer@chr2:241860652-241861096 [rs10207380]                                                                                                                                                                        |                                                                                                                                                                                                                            | 0.37                         | 0.06 |
|                                                                                                                                                                                                                       | rs10207380:rs7591322 D'=1.0; r <sup>2</sup> =0.9.<br>enhancer@chr2:24189989-241900661 [rs7591322]                                                                                                                          | 0.06                         | 0.88 |
| enhancer@chr15:74226590-74227025 [rs2028386,<br>rs4337252]                                                                                                                                                            |                                                                                                                                                                                                                            | 0.37                         | 0.07 |
| p1@ENST00000438379 [rs1182175]                                                                                                                                                                                        |                                                                                                                                                                                                                            | 0.37                         | 0.07 |
| p3@SLC38A9 [rs6450345]                                                                                                                                                                                                |                                                                                                                                                                                                                            | 0.36                         | 0.08 |
|                                                                                                                                                                                                                       | rs6450345:rs2408204 D'=1.0; r <sup>2</sup> =0.91. p4@SLC38A9<br>[rs2408204]                                                                                                                                                | 0.27                         | 0.31 |
| p2@MFAP2 [rs9435732]                                                                                                                                                                                                  |                                                                                                                                                                                                                            | 0.35                         | 0.09 |
|                                                                                                                                                                                                                       | rs9435732:rs732679 D'=0.64; r <sup>2</sup> =0.26.<br>chr1:17371735..17371757,- [rs732679,<br>rs10887994]:rs9435732:rs10887994 D'=0.95; r <sup>2</sup> =0.35.<br>chr1:17371735..17371757,- [rs732679, rs10887994]           | 0.13                         | 0.72 |
| p@chr13:92001646..92001654,+ [rs4284505]                                                                                                                                                                              |                                                                                                                                                                                                                            | 0.35                         | 0.09 |
| p1@ENST00000544890 [rs6633]                                                                                                                                                                                           |                                                                                                                                                                                                                            | 0.35                         | 0.1  |
|                                                                                                                                                                                                                       | rs6633:rs12817892 D'=1.0; r <sup>2</sup> =1.0.<br>p1@ENST00000545406 [rs12817892]                                                                                                                                          | 0.09                         | 0.83 |
| enhancer@chr13:51103280-51103738 [rs536338]                                                                                                                                                                           |                                                                                                                                                                                                                            | 0.35                         | 0.1  |
| chr6:81442621..81442640,+ [rs11756729]                                                                                                                                                                                |                                                                                                                                                                                                                            | 0.34                         | 0.12 |
| p@chr15:84408895..84408904,+ [rs1426160]                                                                                                                                                                              |                                                                                                                                                                                                                            | 0.34                         | 0.12 |
| chr6:32148013..32148032,+ [rs3134943]                                                                                                                                                                                 |                                                                                                                                                                                                                            | 0.33                         | 0.15 |
| chr6:31237739..31237758,+ [rs9264606, rs9264608]                                                                                                                                                                      |                                                                                                                                                                                                                            | 0.33                         | 0.18 |
| p@chr5:33229308..33229311,- [rs7443939]                                                                                                                                                                               |                                                                                                                                                                                                                            | 0.32                         | 0.19 |
| p3@PMPCA [rs3812584]                                                                                                                                                                                                  |                                                                                                                                                                                                                            | 0.32                         | 0.19 |
|                                                                                                                                                                                                                       | same SNP, different promoter: p4@PMPCA [rs3812584]                                                                                                                                                                         | 0.08                         | 0.84 |
| enhancer@chr20:34471781-34472424 [rs3787173]                                                                                                                                                                          |                                                                                                                                                                                                                            | 0.31                         | 0.21 |
|                                                                                                                                                                                                                       | rs3787173:rs11699815 D'=1.0; r <sup>2</sup> =1.0. p7@SCAND1<br>[rs11699815]                                                                                                                                                | 0.11                         | 0.8  |
| p6@ACSS2 [rs3818273]                                                                                                                                                                                                  |                                                                                                                                                                                                                            | 0.31                         | 0.21 |
|                                                                                                                                                                                                                       | rs3818273:rs6120778 D'=1.0; r <sup>2</sup> =0.75. p9@MYH7B<br>[rs6120778]                                                                                                                                                  | 0.0                          | 1.0  |
| p@chr5:134364600..134364638,- [rs479632]                                                                                                                                                                              |                                                                                                                                                                                                                            | 0.31                         | 0.21 |
| p@chr5:32829061..32829092,+ [rs7733331]                                                                                                                                                                               |                                                                                                                                                                                                                            | 0.31                         | 0.23 |
| enhancer@chr19:2182828-2183132 [rs12609327]                                                                                                                                                                           |                                                                                                                                                                                                                            | 0.3                          | 0.24 |
| enhancer@chr10:80918312-80918688 [rs779932, rs779933]                                                                                                                                                                 |                                                                                                                                                                                                                            | 0.3                          | 0.24 |
| p3@ANP32E [rs6679147]                                                                                                                                                                                                 |                                                                                                                                                                                                                            | 0.3                          | 0.26 |
| p4@EHMT2 [rs7887]                                                                                                                                                                                                     |                                                                                                                                                                                                                            | 0.29                         | 0.27 |
|                                                                                                                                                                                                                       | rs7887:rs2072633 D'=0.74; r <sup>2</sup> =0.19. p37@CFB<br>[rs2072633]                                                                                                                                                     | 0.1                          | 0.8  |
| p5@NARFL [rs12597563]                                                                                                                                                                                                 |                                                                                                                                                                                                                            | 0.29                         | 0.27 |
| p5@ITCH [rs6579167]                                                                                                                                                                                                   |                                                                                                                                                                                                                            | 0.29                         | 0.27 |
| p@chr5:131541116..131541121,- [rs10075459]                                                                                                                                                                            |                                                                                                                                                                                                                            | 0.29                         | 0.27 |
| enhancer@chr6:7692548-7692711 [rs7756651]                                                                                                                                                                             |                                                                                                                                                                                                                            | 0.29                         | 0.28 |

|                                                                 |                                                                                                                                                                                                   |      |      |
|-----------------------------------------------------------------|---------------------------------------------------------------------------------------------------------------------------------------------------------------------------------------------------|------|------|
| p@chr6:7786714..7786717,+ [rs5009024]                           |                                                                                                                                                                                                   | 0.28 | 0.28 |
| p@chr20:33734472..33734476,- [rs1415771]                        |                                                                                                                                                                                                   | 0.28 | 0.3  |
| enhancer@chr3:136492102-136492187 [rs9819856]                   |                                                                                                                                                                                                   | 0.28 | 0.3  |
| p3@TNPO1 [rs34651]                                              |                                                                                                                                                                                                   | 0.28 | 0.3  |
| enhancer@chr11:12697923-12698543 [rs7926971]                    |                                                                                                                                                                                                   | 0.28 | 0.3  |
| p@chr10:81113959..81113978,+ [rs7332]                           |                                                                                                                                                                                                   | 0.27 | 0.31 |
| enhancer@chr15:99214674-99215061 [rs2311767]                    |                                                                                                                                                                                                   | 0.27 | 0.32 |
| enhancer@chr3:13555627-13555924 [rs2597513,rs2655226]           |                                                                                                                                                                                                   | 0.27 | 0.32 |
| p@chr12:123616405..123616412,- [rs1727294]                      |                                                                                                                                                                                                   | 0.27 | 0.32 |
| p10@SCUBE3 [rs2071920]                                          |                                                                                                                                                                                                   | 0.26 | 0.33 |
| enhancer@chr5:54886412-54886788 [rs1983189]                     | rs2071920:rs6899744 D'=1.0; r <sup>2</sup> =0.05.<br>p@chr6:35286250..35286262,+ [rs6899744]                                                                                                      | 0.24 | 0.41 |
|                                                                 | rs1983189:rs3936310 D'=0.89; r <sup>2</sup> =0.64.<br>enhancer@chr5:54896440-54896979 [rs3936310]                                                                                                 | 0.13 | 0.72 |
| p5@NOS3 [rs743507]                                              |                                                                                                                                                                                                   | 0.26 | 0.35 |
| p@chr17:30326770..30326783,+ [rs537166]                         |                                                                                                                                                                                                   | 0.25 | 0.36 |
| enhancer@chr5:32768263-32768639 [rs3792752]                     |                                                                                                                                                                                                   | 0.25 | 0.36 |
| enhancer@chr1:23448967-23449247 [rs1571466]                     |                                                                                                                                                                                                   | 0.25 | 0.37 |
|                                                                 | rs1571466:rs2806561 D'=1.0; r <sup>2</sup> =1.0. p3@LUZP1 [rs2806561]                                                                                                                             | 0.13 | 0.73 |
| p@chr6:32575596..32575598,- [rs9461776]                         |                                                                                                                                                                                                   | 0.24 | 0.39 |
| enhancer@chr9:95288173-95288480 [rs4744137]                     |                                                                                                                                                                                                   | 0.24 | 0.39 |
| p@chr19:7184803..7184814,- [rs891088]                           |                                                                                                                                                                                                   | 0.24 | 0.41 |
| p@chr6:142702634..142702638,+ [rs7757571]                       |                                                                                                                                                                                                   | 0.24 | 0.41 |
| p@chr1:172134755..172134764,+ [rs537444]                        |                                                                                                                                                                                                   | 0.23 | 0.42 |
|                                                                 | same SNP, different promoter:<br>p@chr1:172134736..172134739,+ [rs537444]                                                                                                                         | 0.1  | 0.8  |
| p@chr12:56727954..56727978,+ [rs2371494]                        |                                                                                                                                                                                                   | 0.23 | 0.42 |
| enhancer@chr8:135628946-135629314 [rs7010948,rs7011157]         |                                                                                                                                                                                                   | 0.23 | 0.44 |
|                                                                 | rs7010948:rs894344 D'=0.89; r <sup>2</sup> =0.59.<br>p@chr8:135612764..135612786,- [rs894344];rs7011157:rs894344 D'=0.89; r <sup>2</sup> =0.59.<br>p@chr8:135612764..135612786,- [rs894344]       | 0.18 | 0.56 |
| p1@C20orf173 [rs6060450]                                        |                                                                                                                                                                                                   | 0.23 | 0.44 |
| p13@TGFB2 [rs991967]                                            |                                                                                                                                                                                                   | 0.22 | 0.46 |
| p@chr20:33356385..33356390,- [rs2295353]                        |                                                                                                                                                                                                   | 0.22 | 0.47 |
| p@chr13:33232408..33232414,+ [rs2301393,rs7335546]              |                                                                                                                                                                                                   | 0.21 | 0.48 |
| p@chr12:93967885..93967910,+ [rs3782415]                        |                                                                                                                                                                                                   | 0.21 | 0.49 |
| enhancer@chr5:131406243-131406684 [rs721121]                    |                                                                                                                                                                                                   | 0.21 | 0.49 |
| p@chr19:3434311..3434347,+ [rs2074977]                          |                                                                                                                                                                                                   | 0.21 | 0.49 |
| enhancer@chr1:77980165-77980378 [rs12729914]                    |                                                                                                                                                                                                   | 0.21 | 0.49 |
| enhancer@chr2:25457688-25458068 [rs11695471]                    |                                                                                                                                                                                                   | 0.21 | 0.49 |
|                                                                 | rs11695471:rs7594432 D'=1.0; r <sup>2</sup> =0.35.<br>enhancer@chr2:25482494-25482888 [rs7594432]                                                                                                 | 0.17 | 0.6  |
| p13@ESR1 [rs2077647]                                            |                                                                                                                                                                                                   | 0.2  | 0.5  |
| enhancer@chr7:2749963-2750288 [rs7798875]                       |                                                                                                                                                                                                   | 0.2  | 0.5  |
| enhancer@chr6:131327805-131328036 [rs6921207]                   |                                                                                                                                                                                                   | 0.2  | 0.5  |
| p@chr3:171965372..171965436,+ [rs1039027]                       |                                                                                                                                                                                                   | 0.2  | 0.52 |
| enhancer@chr12:94178297-94178734 [rs10859579]                   |                                                                                                                                                                                                   | 0.19 | 0.53 |
| p@chr12:11898277..11898290,+ [rs1009954]                        |                                                                                                                                                                                                   | 0.19 | 0.54 |
| p10@FAM134A [rs3210652]                                         |                                                                                                                                                                                                   | 0.19 | 0.54 |
| enhancer@chr14:68699331-68699744 [rs1314913]                    |                                                                                                                                                                                                   | 0.19 | 0.56 |
| p@chr18:46582506..46582523,+ [rs16950294,rs16950298,rs16950303] |                                                                                                                                                                                                   | 0.18 | 0.59 |
| enhancer@chr20:6594261-6594618 [rs6038557,rs6054392]            |                                                                                                                                                                                                   | 0.18 | 0.59 |
| enhancer@chr2:88899554-88899981 [rs1913671]                     |                                                                                                                                                                                                   | 0.17 | 0.59 |
| p@chr6:26500524..26500540,+ [rs13194984]                        |                                                                                                                                                                                                   | 0.17 | 0.6  |
| enhancer@chr17:61639369-61639739 [rs9906747]                    |                                                                                                                                                                                                   | 0.17 | 0.61 |
| p2@SLFN1 [rs17357954]                                           |                                                                                                                                                                                                   | 0.17 | 0.61 |
| p@chr6:35765153..35765158,+ [rs2766597]                         |                                                                                                                                                                                                   | 0.17 | 0.61 |
| p@chr6:32412808..32412821,- [rs3135388]                         |                                                                                                                                                                                                   | 0.16 | 0.61 |
| p@chr15:84295121..84295125,+ [rs2585070]                        |                                                                                                                                                                                                   | 0.16 | 0.62 |
| enhancer@chr13:51210187-51210463 [rs7991818]                    |                                                                                                                                                                                                   | 0.16 | 0.62 |
| p4@SLC3A1 [rs3738985]                                           |                                                                                                                                                                                                   | 0.16 | 0.63 |
| enhancer@chr2:233181304-233181393 [rs6743962]                   |                                                                                                                                                                                                   | 0.16 | 0.63 |
| enhancer@chr20:47471567-47471956 [rs6012541,rs6095329]          |                                                                                                                                                                                                   | 0.15 | 0.65 |
|                                                                 | rs6012541:rs752421 D'=0.98; r <sup>2</sup> =0.95.<br>enhancer@chr20:47434951-47435381 [rs752421];rs6095329:rs752421 D'=0.98; r <sup>2</sup> =0.95.<br>enhancer@chr20:47434951-47435381 [rs752421] | 0.07 | 0.85 |
| enhancer@chr11:65248969-65249218 [rs1787666]                    |                                                                                                                                                                                                   | 0.15 | 0.66 |
| p@chr7:20392799..20392811,+ [rs2214442]                         |                                                                                                                                                                                                   | 0.13 | 0.72 |
| p@chr9:98245687..98245692,- [rs17369383]                        |                                                                                                                                                                                                   | 0.13 | 0.73 |
| enhancer@chr15:70047760-70048370 [rs10152590,rs10152591]        |                                                                                                                                                                                                   | 0.12 | 0.76 |
| enhancer@chr2:25136821-25136958 [rs10203386]                    |                                                                                                                                                                                                   | 0.12 | 0.77 |
|                                                                 | rs10203386:rs9631062 D'=0.96; r <sup>2</sup> =0.52.<br>p@chr2:25110228..25110248,+ [rs9631062]                                                                                                    | 0.09 | 0.81 |
| p@chr1:184128142..184128173,+ [rs6424925]                       |                                                                                                                                                                                                   | 0.11 | 0.77 |
| chr5:168233584..168233600,- [rs17553840]                        |                                                                                                                                                                                                   | 0.1  | 0.8  |
|                                                                 | rs17553840:rs17635284 D'=1.0; r <sup>2</sup> =1.0.<br>p@chr5:168246378..168246386,+ [rs17635284]                                                                                                  | 0.02 | 0.98 |
| p9@ITIH4 [rs13072536]                                           |                                                                                                                                                                                                   | 0.1  | 0.8  |
| p1@C2CD4A [rs8039105]                                           |                                                                                                                                                                                                   | 0.1  | 0.8  |
| p@chr6:76415669..76415672,+ [rs9343320]                         |                                                                                                                                                                                                   | 0.1  | 0.8  |
| p4@MICAL1 [rs2277113]                                           |                                                                                                                                                                                                   | 0.1  | 0.81 |
|                                                                 | rs2277113:rs9398202 D'=1.0; r <sup>2</sup> =0.88.<br>enhancer@chr6:109780095-109780443 [rs9398202]                                                                                                | 0.07 | 0.85 |
| enhancer@chr3:135861520-135861675 [rs9881400]                   |                                                                                                                                                                                                   | 0.09 | 0.84 |
| p@chr1:149875845..149875874,- [rs7534365]                       |                                                                                                                                                                                                   | 0.08 | 0.84 |
| enhancer@chr11:48102794-48103200 [rs6485807]                    |                                                                                                                                                                                                   | 0.08 | 0.84 |
| p8@PRKG2 [rs788861]                                             |                                                                                                                                                                                                   | 0.08 | 0.84 |
| p@chr5:131675781..131675785,+ [rs272872]                        |                                                                                                                                                                                                   | 0.08 | 0.84 |
| p@chr6:6884633..6884678,- [rs4960263]                           |                                                                                                                                                                                                   | 0.08 | 0.84 |
| enhancer@chr20:34689096-34689267 [rs2746102]                    |                                                                                                                                                                                                   | 0.07 | 0.86 |
| p@chr3:11643506..11643527,- [rs2276749]                         |                                                                                                                                                                                                   | 0.06 | 0.87 |
| p@chr2:219610047..219610074,- [rs2272189]                       |                                                                                                                                                                                                   | 0.06 | 0.88 |

|                                              |                                                                                                                                                                                                |      |      |
|----------------------------------------------|------------------------------------------------------------------------------------------------------------------------------------------------------------------------------------------------|------|------|
| p@chr5:179737830..179737831,- [rs888926]     |                                                                                                                                                                                                | 0.05 | 0.91 |
| enhancer@chr6:34358644-34359014 [rs3798564]  |                                                                                                                                                                                                | 0.05 | 0.91 |
| p2@ENST00000473753 [rs11049416]              |                                                                                                                                                                                                | 0.05 | 0.91 |
| enhancer@chr7:28122864-28123088 [rs10951191] |                                                                                                                                                                                                | 0.04 | 0.93 |
| p6@CCDC91 [rs10843172]                       |                                                                                                                                                                                                | 0.04 | 0.93 |
| p@chr9:139118938..139118947,- [rs10858250]   |                                                                                                                                                                                                | 0.04 | 0.93 |
| p3@HCG22 [rs4713429, rs9262615]              |                                                                                                                                                                                                | 0.04 | 0.93 |
|                                              | rs4713429:rs7744253 D'=0.94; r <sup>2</sup> =0.86.<br>p@chr6:31023284..31023287,-<br>[rs7744253];rs9262615:rs7744253 D'=0.92; r <sup>2</sup> =0.84.<br>p@chr6:31023284..31023287,- [rs7744253] | 0.03 | 0.96 |
| chr17:21279520..21279522,+ [rs7213608]       |                                                                                                                                                                                                | 0.02 | 0.97 |
| p2@SOCS5 [rs3829835]                         |                                                                                                                                                                                                | 0.01 | 0.99 |
| p@chr20:34820071..34820089,+ [rs3813918]     |                                                                                                                                                                                                | 0.01 | 0.99 |
| p@chr15:100749314..100749319,- [rs5026360]   |                                                                                                                                                                                                | 0.0  | 1.0  |

| Cell type                                                              | RRA p   | FDR     |
|------------------------------------------------------------------------|---------|---------|
| Skeletal Muscle Cells                                                  | 6.4e-10 | 0       |
| K562 erythroblastic leukemia response to hemin 00hr45min               | 1.6e-07 | 0       |
| COBLA rinderpest infection 06hr                                        | 7.2e-07 | 0       |
| Fibroblast skin normal(cytoplasmic)                                    | 1.1e-06 | 0       |
| K562 erythroblastic leukemia response to hemin 03hr00min               | 3.7e-06 | 0       |
| COBLA rinderpest infection 24hr                                        | 4.3e-06 | 0       |
| Hair Follicle Dermal Papilla Cells                                     | 1.5e-05 | 0       |
| Preadipocyte subcutaneous                                              | 3.5e-05 | 0       |
| Schwann Cells                                                          | 3.9e-05 | 0       |
| iPS differentiation to neuron downsyndrome donor C11CCL54 day00        | 4.1e-05 | 0       |
| H1 embryonic stem cells differentiation to CD34 HSC day00              | 5.8e-05 | 0       |
| Preadipocyte visceral                                                  | 6.4e-05 | 0       |
| Mesenchymal Stem Cells bone marrow                                     | 7.7e-05 | 0       |
| Skeletal muscle cells differentiated into Myotubes multinucleated      | 0.00014 | 0       |
| iPS differentiation to neuron control donor C11CRL2429 day00           | 0.00015 | 0       |
| Fibroblast Cardiac                                                     | 0.0002  | 0       |
| Renal Glomerular Endothelial Cells                                     | 0.00024 | 0       |
| 293SLAM rinderpest infection 00hr                                      | 0.00035 | 0       |
| Osteoblast                                                             | 0.00035 | 0       |
| Skeletal Muscle Satellite Cells                                        | 0.00061 | 0       |
| Fibroblast Dermal                                                      | 0.00071 | 0       |
| Hepatic Stellate Cells (lipocyte)                                      | 0.00093 | 0       |
| Smooth Muscle Cells Bronchial                                          | 0.0078  | 0       |
| Mammary Epithelial Cell                                                | 0.0089  | 0       |
| Prostate Stromal Cells                                                 | 0.018   | 0       |
| Endothelial Cells Artery                                               | 0.022   | 0       |
| Meningeal Cells                                                        | 0.035   | 0       |
| Smooth Muscle Cells Tracheal                                           | 0.038   | 0       |
| Smooth muscle cells airway asthmatic                                   | 1.4e-05 | 0.00021 |
| K562 erythroblastic leukemia response to hemin 12hr                    | 0.00013 | 0.00021 |
| Ciliary Epithelial Cells                                               | 0.0062  | 0.00021 |
| Hep2 cells treated with Streptococci strain 5448                       | 0.0072  | 0.00021 |
| Renal Epithelial Cells                                                 | 0.0079  | 0.00021 |
| Smooth Muscle Cells Umbilical Artery                                   | 0.028   | 0.00021 |
| mesenchymal precursor cell adipose                                     | 0.028   | 0.00021 |
| Fibroblast Aortic Adventitial                                          | 0.047   | 0.00021 |
| Mesenchymal Stem Cells adipose                                         | 5.7e-06 | 0.00037 |
| K562 erythroblastic leukemia response to hemin day04                   | 2.5e-05 | 0.00037 |
| Alveolar Epithelial Cells                                              | 0.0003  | 0.00037 |
| COBLA rinderpest infection 12hr                                        | 0.0022  | 0.00037 |
| Smooth Muscle Cells Umbilical Vein                                     | 0.0058  | 0.00037 |
| K562 erythroblastic leukemia response to hemin 00hr00min               | 4.7e-07 | 0.00051 |
| HES3GFP Embryonic Stem cells cardiomyocytic induction                  | 0.00021 | 0.00051 |
| COBLA rinderpest infection 00hr                                        | 0.00029 | 0.00051 |
| lymph endothelial cells VEGF 00hr15min                                 | 0.02    | 0.00051 |
| Fibroblast Gingival(periodontitis)                                     | 0.0082  | 0.00066 |
| K562 erythroblastic leukemia response to hemin day03                   | 0.00019 | 0.00081 |
| Corneal Epithelial Cells                                               | 0.0016  | 0.00086 |
| Endothelial Cells Vein                                                 | 0.0054  | 0.00086 |
| aorticSMC responsetoIL1b immediate early 00hr15min                     | 0.0074  | 0.00086 |
| Smooth Muscle Cells Brachiocephalic                                    | 0.011   | 0.00086 |
| Fibroblast Periodontal Ligament                                        | 0.013   | 0.00086 |
| Saos2calc 00hr15min                                                    | 0.04    | 0.00086 |
| K562 erythroblastic leukemia response to hemin 06hr                    | 2.5e-05 | 0.00095 |
| COBLA rinderpestC infection 24hr                                       | 4.4e-05 | 0.00095 |
| iPS differentiation to neuron control donor C32CRL1502 day00           | 0.00022 | 0.0012  |
| Retinal Pigment Epithelial Cells                                       | 0.018   | 0.0012  |
| 293SLAM rinderpest infection 12hr                                      | 0.0022  | 0.0013  |
| K562 erythroblastic leukemia response to hemin day02                   | 9.9e-05 | 0.0013  |
| mesenchymalstemcells(adiposederived)adipogenicinduction 00hr30min      | 0.00049 | 0.0013  |
| Fibroblast Aortic Adventitial(cytoplasmic)                             | 0.016   | 0.0013  |
| mesenchymal precursor cell cardiac                                     | 0.037   | 0.0013  |
| 293SLAM rinderpest infection 06hr                                      | 0.0035  | 0.0016  |
| Tracheal Epithelial Cells                                              | 0.012   | 0.0017  |
| iPS differentiation to neuron downsyndrome donor C18CCL54 day06        | 0.00011 | 0.0017  |
| mesenchymal precursor cell ovarian cancer right ovary                  | 0.0021  | 0.0019  |
| 293SLAM rinderpest infection 24hr                                      | 3.4e-05 | 0.002   |
| K562 erythroblastic leukemia response to hemin 01hr00min               | 0.0019  | 0.0026  |
| K562 erythroblastic leukemia response to hemin 00hr30min               | 0.00021 | 0.0027  |
| HES3GFP Embryonic Stem cells cardiomyocytic induction day08            | 0.0016  | 0.0027  |
| K562 erythroblastic leukemia response to hemin 01hr40min               | 0.00078 | 0.0031  |
| Placental Epithelial Cells                                             | 0.014   | 0.0031  |
| HES3GFP Embryonic Stem cells cardiomyocytic induction day05            | 0.0085  | 0.0031  |
| iPS differentiation to neuron downsyndrome donor C18CCL54 day00        | 0.0088  | 0.0031  |
| K562 erythroblastic leukemia response to hemin 03hr30min               | 0.0029  | 0.0032  |
| COBLA rinderpestC infection 12hr                                       | 0.0084  | 0.0035  |
| iPS differentiation to neuron downsyndrome donor C11CCL54 day18        | 0.015   | 0.0038  |
| HES3GFP Embryonic Stem cells cardiomyocytic induction day03            | 0.00033 | 0.0039  |
| iPS differentiation to neuron control donor C11CRL2429 day18           | 0.038   | 0.0044  |
| Mesenchymal Stem Cells umbilical                                       | 0.022   | 0.0056  |
| Bronchial Epithelial Cell                                              | 0.00017 | 0.0061  |
| Myoblast differentiation to myotubes day00 Duchenne Muscular Dystrophy | 0.00011 | 0.0069  |
| K562 erythroblastic leukemia response to hemin 00hr15min               | 0.00087 | 0.0076  |

|                                                             |         |       |
|-------------------------------------------------------------|---------|-------|
| Fibroblast Gingival                                         | 0.004   | 0.011 |
| K562 erythroblastic leukemia response to hemin 04hr         | 0.0049  | 0.011 |
| HES3GFP Embryonic Stem cells cardiomyocytic induction day07 | 0.0051  | 0.011 |
| K562 erythroblastic leukemia response to hemin 01hr20min    | 0.01    | 0.012 |
| Hepatic Sinusoidal Endothelial Cells                        | 0.045   | 0.012 |
| hIPS                                                        | 0.0013  | 0.012 |
| ARPE19 EMT induced with TGFbeta and TNFalpha 24hr00min      | 4.7e-07 | 0.015 |
| K562 erythroblastic leukemia response to hemin 02hr30min    | 0.016   | 0.017 |
| HES3GFP Embryonic Stem cells cardiomyocytic induction day04 | 0.024   | 0.018 |
| ARPE19 EMT induced with TGFbeta and TNFalpha 08hr00min      | 0.02    | 0.018 |
| K562 erythroblastic leukemia response to hemin 02hr00min    | 0.031   | 0.019 |
| ARPE19 EMT induced with TGFbeta and TNFalpha 01hr40min      | 0.037   | 0.021 |
| HES3GFP Embryonic Stem cells cardiomyocytic induction day01 | 0.027   | 0.03  |
| HES3GFP Embryonic Stem cells cardiomyocytic induction day06 | 0.044   | 0.034 |
